# Supplementary material for: A fluorescent aptasensor with product-triggered amplification by exonuclease III digestion for highly sensitive ATP detection
Source: Royal Society of Chemistry journal article supplement (doi:10.1039/c7ay01473b), 2017-01-01
Supplement: c7ay01473b1.pdf [file c7ay01473b1.pdf]

## Supplementary Material

### Fluorescent aptasensor with product-triggered amplification by exonuclease III digestion for highly sensitive ATP detection

Shengnan He<sup>a, b, †</sup>, Long Qu<sup>c, d, †</sup>, Ying Tan<sup>c, d</sup>, Feng Liu<sup>c, d</sup>, Yu Wang<sup>a</sup>, Wei Zhang<sup>d</sup>, Zhiming Cai<sup>a</sup>,  
Lisha Mou<sup>a, \*</sup>, Yuyang Jiang<sup>c, d, \*</sup>

<sup>a</sup> Shenzhen Xenotransplantation Medical Engineering Research and Development Center, Institute of Translational Medicine, Shenzhen Second People's Hospital, First Affiliated Hospital of Shenzhen University, Shenzhen, Guangdong, 518035, China. E-mail address: lishamou@gmail.com; Tel: +86-755-83366388-3230

<sup>b</sup> Department of Pharmacology and Proteomics Center, Zhongshan School of Medicine, Sun Yat-sen University, 74 Zhongshan Road II, Guangzhou, 510080, China

<sup>c</sup> Department of Chemistry, Tsinghua University, Beijing, 100084, China. E-mail address: jiangyy@sz.tsinghua.edu.cn; Tel: +86-755-2603-6533

<sup>d</sup> The Ministry-Province Jointly Constructed Base for State Key Lab- Shenzhen Key Laboratory of Chemical Biology, The Graduate School at Shenzhen, Tsinghua University, Shenzhen, Guangdong, 518055, China

\*Corresponding authors.

Tel: +86-755-83366388-3230 (Lisha Mou); +86-755-2603-6533 (Yuyang Jiang)

E-mail address: lishamou@gmail.com (Lisha Mou); jiangyy@sz.tsinghua.edu.cn (Yuyang Jiang)

† These authors contributed equally to this work.

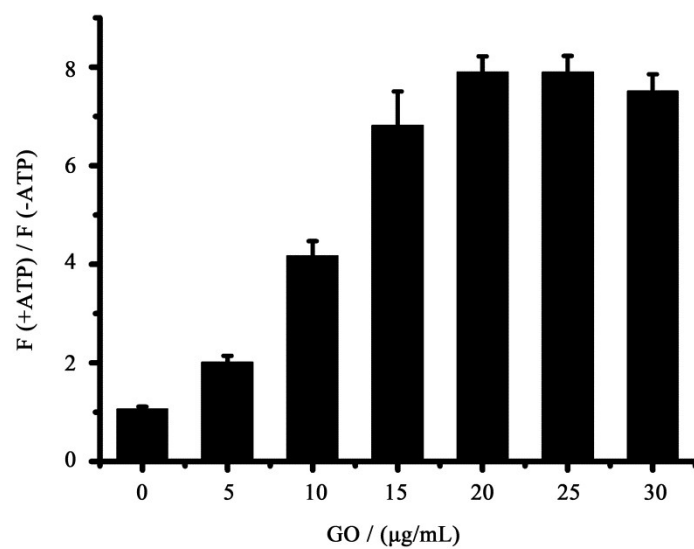

**Fig. S1** Optimization the amount of graphene oxide (GO) in the system. After treated by Exo III both in the presence and absence of 100  $\mu\text{M}$  ATP, the probe was incubated with different concentrations of GO (0, 5, 10, 15, 20, 25, 30  $\mu\text{g/mL}$ ) for 15 min. The ratio  $F(+ATP)/F(-ATP)$  was calculated for the GO amount optimization.

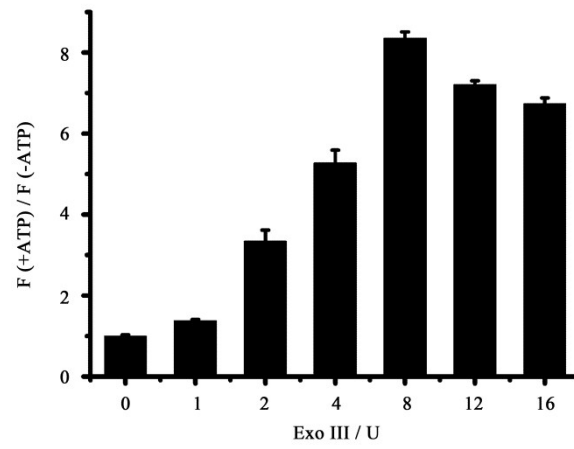

**Fig. S2** Optimization of the amount of Exonuclease III (Exo III) for ATP detection. The assay probe was incubated with 100  $\mu$ M ATP followed by the treatment with different amount of Exo III (0, 1, 2, 4, 8, 12, 16 U) in 20  $\mu$ L of NEBuffer 1 at room temperature for 30 min. For each group, 8  $\mu$ l of graphene oxide (0.5 mg/mL) was added for quenching the fluorescent labeled in the probe.

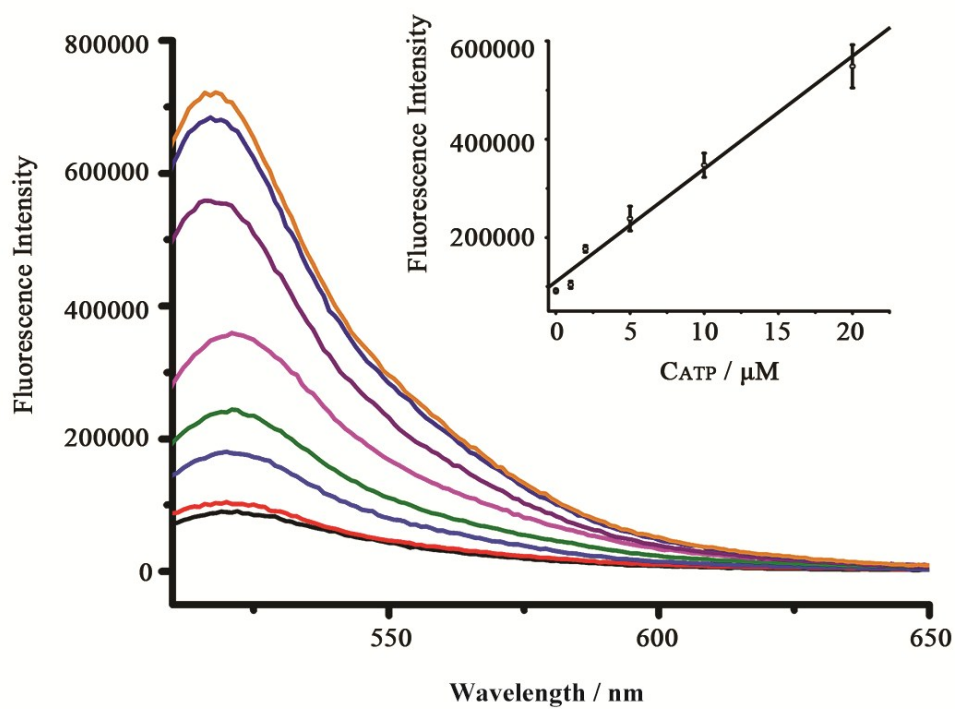

**Fig. S3** Fluorescence emission spectra of the control probe with a series concentration of ATP (from down to top: 0, 1, 2, 5, 10, 20, 50, 100  $\mu\text{M}$ ) after incubation at 25  $^{\circ}\text{C}$  for 30 min. The inset shows a linear relationship between the peak fluorescent intensities (517 nm) and the ATP concentrations range from 0 to 20  $\mu\text{M}$ .
